# Supplementary material
Source: publisher site journal article supplement (https://www.dovepress.com/article/576155)
Supplement: Supplementary file 1 [file 576155_Supplementary%20materials.docx]

**Supplementary Figure 1. Revised forest plot of the relative risk of lung cancer associated with ICS use among individuals with COPD**


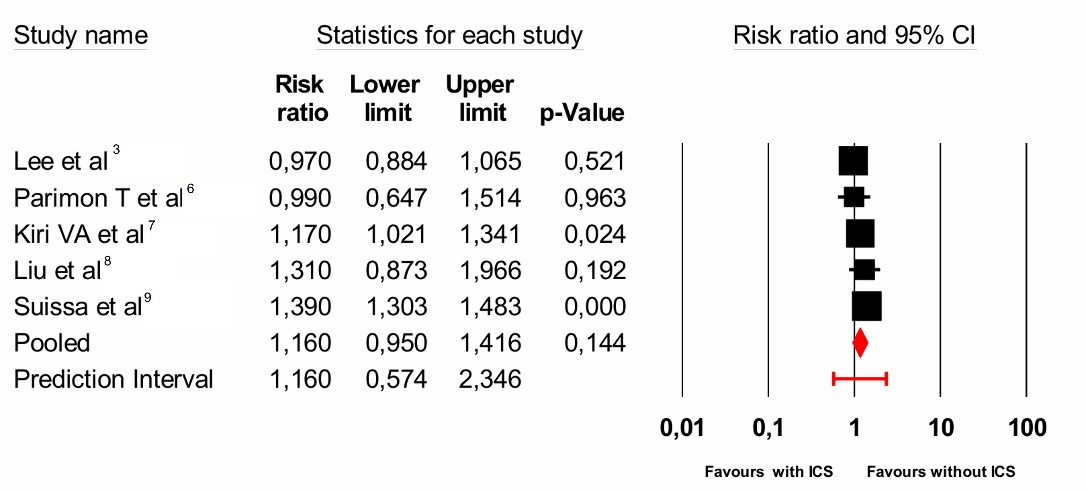


Squares represent individual study relative risk (RR) estimates, with size proportional to study weight.

Horizontal lines indicate 95% confidence intervals.

The red diamond represents the pooled RR estimated using a random-effects model.

The red horizontal bar indicates the 95% prediction interval

**Supplementary Figure 2. Forest plot of the risk difference of lung cancer associated with ICS use among individuals with COPD**


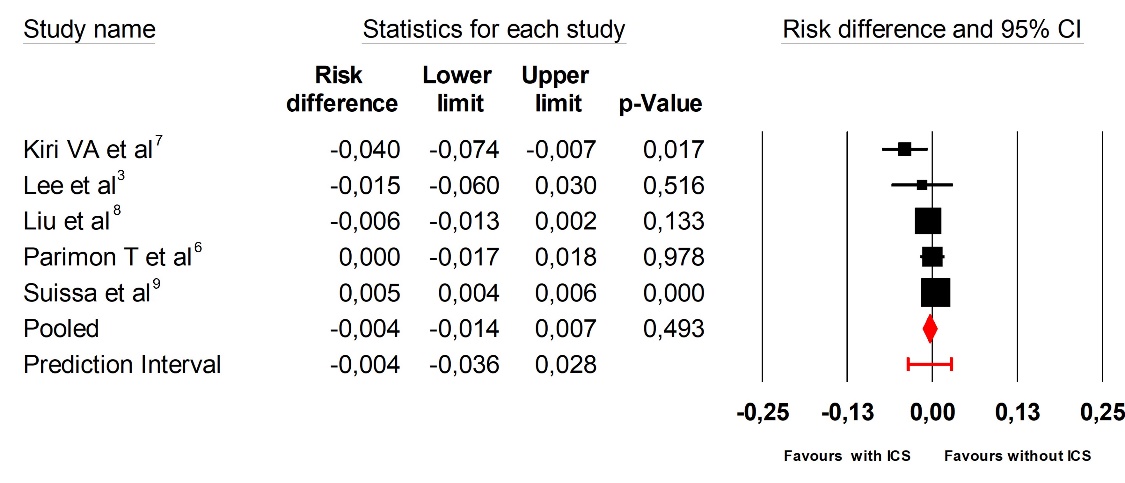


Squares represent individual study risk difference (RD) estimates, with size proportional to study weight.

Horizontal lines indicate 95% confidence intervals.

The red diamond represents the pooled RD estimatedusing a random-effects model.

The red horizontal bar indicates the 95% prediction interval.

*All references cited in the supplementary figures are listed and numbered according to the reference list provided in the main manuscript.*
